# Supplementary material for: Andean Sprouted Pseudocereals to Produce Healthier Extrudates: Impact in Nutritional and Physicochemical Properties
Source: MDPI journal article supplement (doi:10.3390/foods11203259), 2022-10-18
Supplement: s1 [file s1]

**Table S1.** Predictive regression models describing the relationships between the nutritional and bioactive attributes of extrudates with corn-sprouted pseudocereals flour blends.

| Dependent Variables                | Mathematical Models                                                           | R <sup>2</sup> (Pred) | p-value |
|------------------------------------|-------------------------------------------------------------------------------|-----------------------|---------|
| PA                                 | $0.34x_1 + 0.54x_2 + 0.60x_3 + 0.25x_1x_2 - 3.31x_1x_2x_3$                    | 93.95                 | <0.001  |
| GABA                               | $7.07x_1 + 41.51x_2 + 35.59x_3 - 46.37x_2x_3 + 371.61x_1x_2x_3$               | 96.92                 | <0.001  |
| TSPC                               | $26x_1 + 878x_2 + 1970x_3 - 6007x_1x_2x_3$                                    | 95.91                 | <0.001  |
| ORAC                               | $20.69x_1 + 77.76x_2 + 118.91x_3 - 50.84x_1x_2 - 469.18x_1x_2x_3$             | 97.27                 | <0.001  |
| Expansion index                    | $2.04x_1 + 0.90x_2 + 0.97x_3 - 1.79x_1x_3$                                    | 95.26                 | <0.001  |
| Bulk density                       | $0.15x_1 + 0.43x_2 + 0.71x_3 + 1.21x_1x_3$                                    | 80.16                 | 0.003   |
| Shear work                         | $318x_1 + 62x_2 + 20x_3 - 467x_1x_2 - 500x_1x_3 + 1250x_1x_2x_3$              | 95.15                 | <0.001  |
| Water absorption index             | $4.69x_1 + 5.90x_2 + 3.59x_3 - 26.27x_1x_2x_3$                                | 85.79                 | <0.001  |
| Water solubility index             | $8.73x_1 + 23.59x_2 + 25.22x_3 - 16.90x_2x_3$                                 | 93.41                 | <0.001  |
| Instrumental color parameter $L^*$ | $61.26x_1 + 40.78x_2 + 35.32x_3 - 24.32x_1x_3 - 17.15x_2x_3$                  | 98.61                 | <0.001  |
| Instrumental color parameter $a^*$ | $5.72x_1 + 8.81x_2 + 8.13x_3 + 4.76x_1x_3 + 10.01x_2x_3 - 40.49x_1x_2x_3$     | 95.62                 | <0.001  |
| Instrumental color parameter $b^*$ | $37.16x_1 + 21.14x_2 + 20.98x_3 - 27.49x_1x_2 - 22.71x_1x_3 + 53.31x_1x_2x_3$ | 98.08                 | <0.001  |

Regression models include only significant terms (ANOVA,  $p \leq 0.05$ ). Independent variables in the equation include ratio of corn grits ( $x_1$ ); ratio of sprouted quinoa flour ( $x_2$ ) and ratio of sprouted cañihua flour ( $x_3$ ); Abbreviations: GABA,  $\gamma$ -aminobutyric acid; ORAC, oxygen radical absorbance capacity; PA, phytic acid; TSPC, total soluble phenolic compounds.
